# Supplementary material for: Avocado Seeds-Mediated Alleviation of Cyclosporine A-Induced Hepatotoxicity Involves the Inhibition of Oxidative Stress and Proapoptotic Endoplasmic Reticulum Stress
Source: MDPI journal article supplement (doi:10.3390/molecules27227859), 2022-11-14
Supplement: s1 [file s1]

## Suppl file shows raw data of real time PCR

### 1) *XBPI* gene

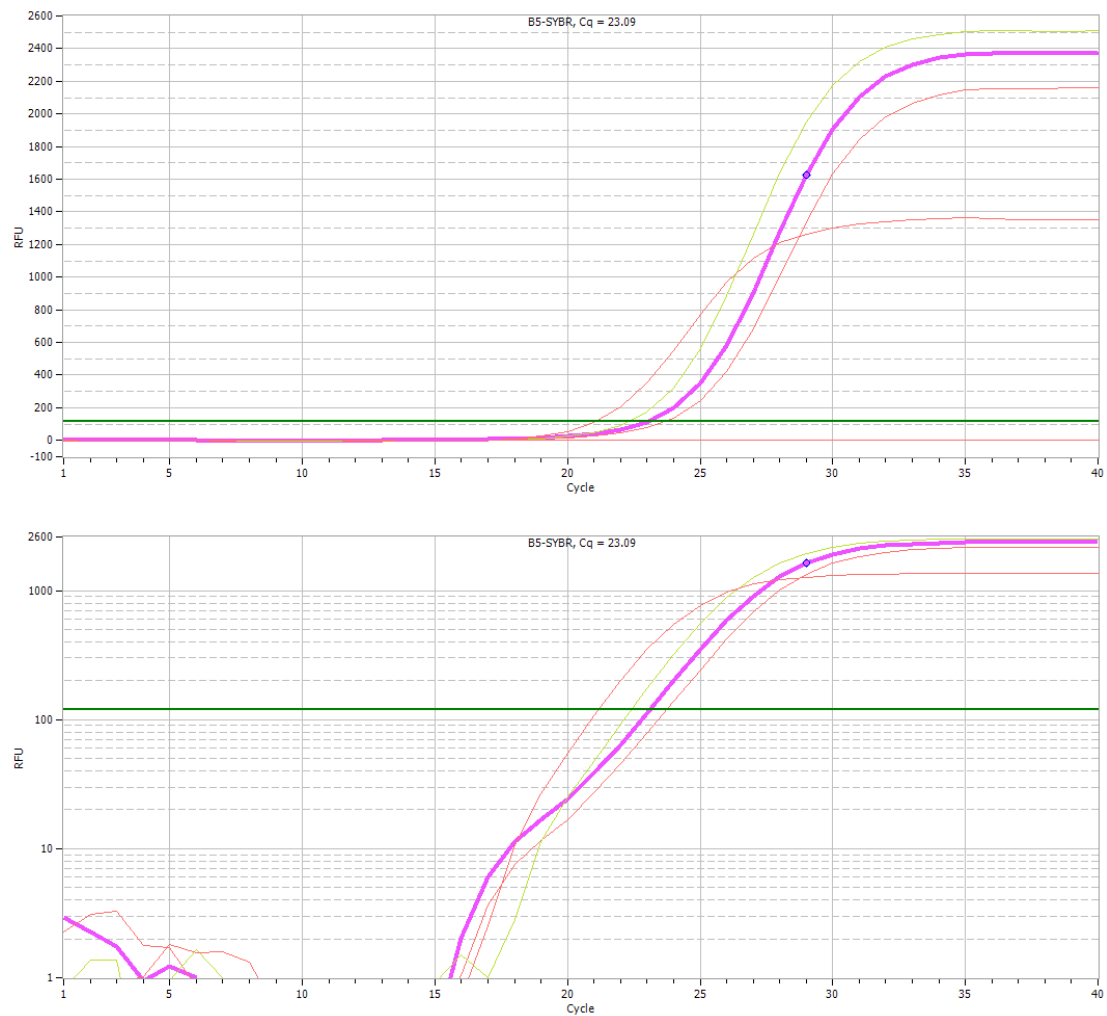

Linear (upper) and log (lower) views of the amplification curves representing the Ct values of *XBPI*.

### Calculation of fold change

| Group    | <i>XBPI</i><br>Aver CT | Delta Ct | Delta<br>delta Ct | Fold<br>change | SEM  |
|----------|------------------------|----------|-------------------|----------------|------|
| Cnt      | 23.09                  | -6.04    | 0.00              | 1.00           | 0    |
| AvS      | 23.69                  | -5.97    | 0.07              | 0.95           | 0.06 |
| CsA      | 21.12                  | -6.02    | 0.02              | 0.99           | 0.1  |
| AvS+ CsA | 22.33                  | -5.83    | 0.21              | 0.86           | 0.05 |

## 2) BIP gene

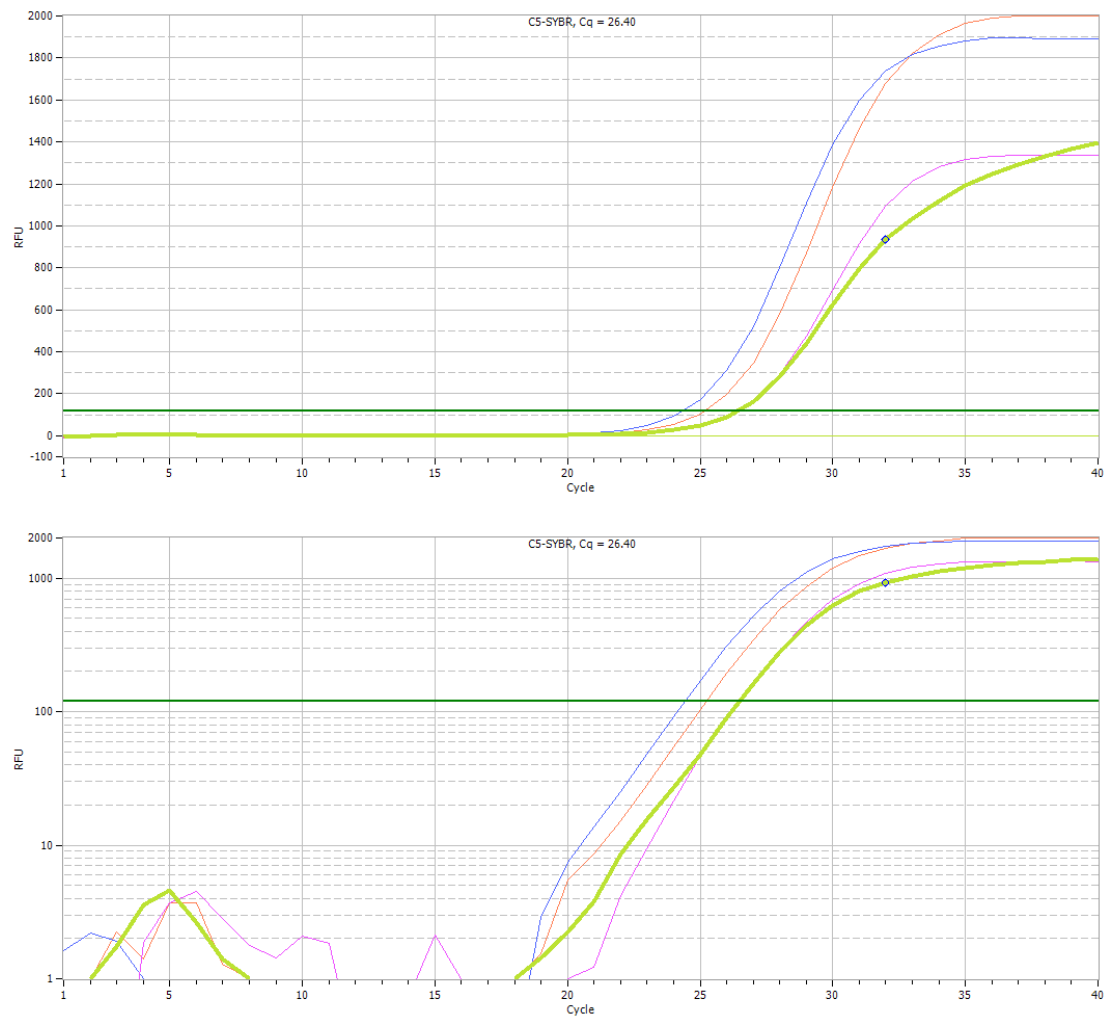

Linear (upper) and log (lower) views of the amplification curves representing the Ct values of *BIP*.

### Calculation of fold change

| Group    | <i>BIP</i><br>Aver CT | Delta Ct | Delta<br>delta Ct | Fold<br>change | SEM  |
|----------|-----------------------|----------|-------------------|----------------|------|
| Cnt      | 26.4                  | 2.01     | 0.00              | 1.00           | 0    |
| AvS      | 26.37                 | 1.71     | -0.30             | 1.23           | 0.11 |
| CsA      | 24.35                 | -0.27    | -2.28             | 4.86           | 0.3  |
| AvS+ CsA | 25.16                 | 0.37     | -1.64             | 3.12           | 0.22 |

### 3) CHOP gene

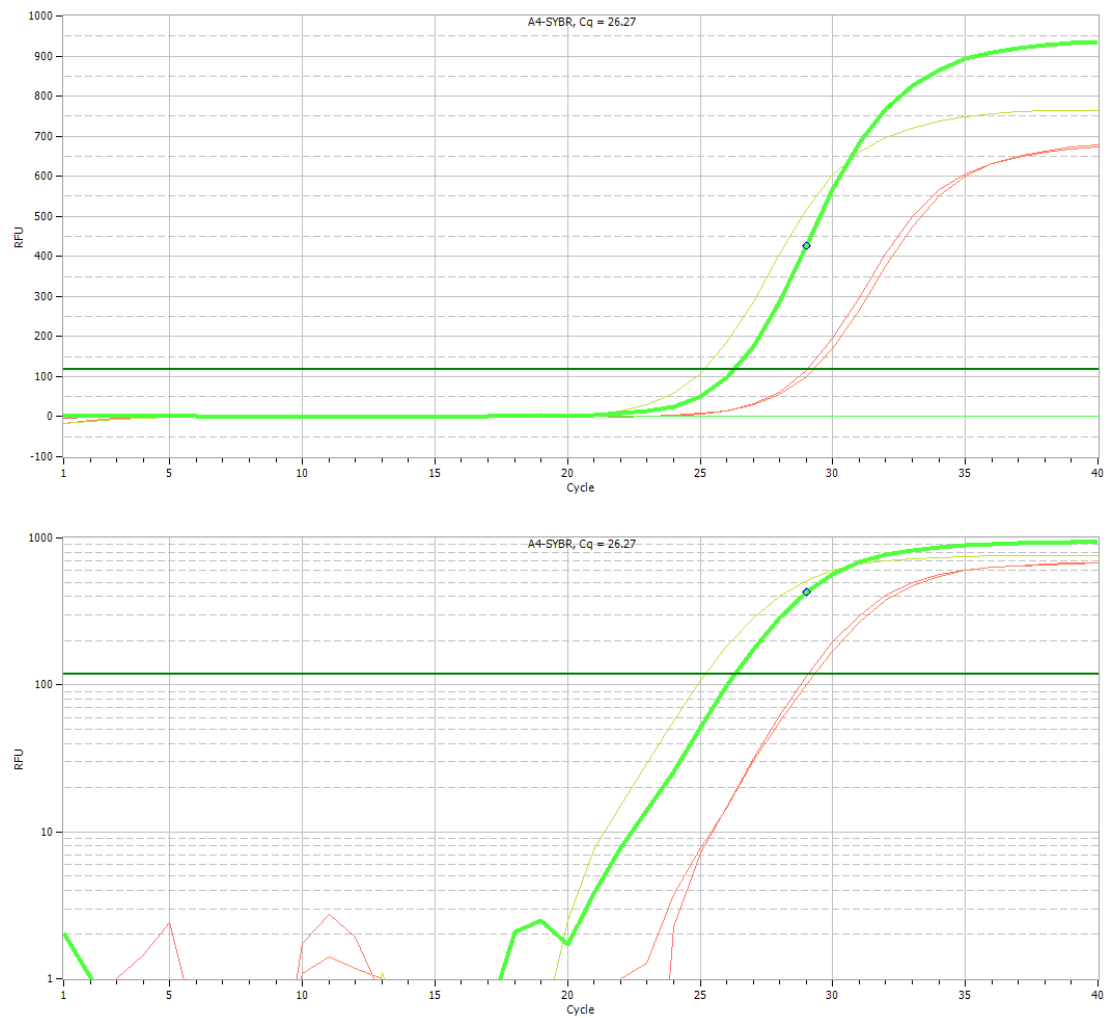

Linear (upper) and log (lower) views of the amplification curves representing the Ct values of *CHOP*.

Calculation of fold change

| Group    | <i>CHOP</i><br>Aver CT | Delta Ct | Delta<br>delta Ct | Fold<br>change | SEM  |
|----------|------------------------|----------|-------------------|----------------|------|
| Cnt      | 29.06                  | 4.67     | 0.00              | 1.00           | 0    |
| AvS      | 29.27                  | 4.47     | -0.20             | 1.15           | 0.14 |
| CsA      | 25.16                  | 2.06     | -2.61             | 6.11           | 0.45 |
| AvS+ CsA | 26.27                  | 2.54     | -2.13             | 4.38           | 0.31 |

#### 4) Bax gene

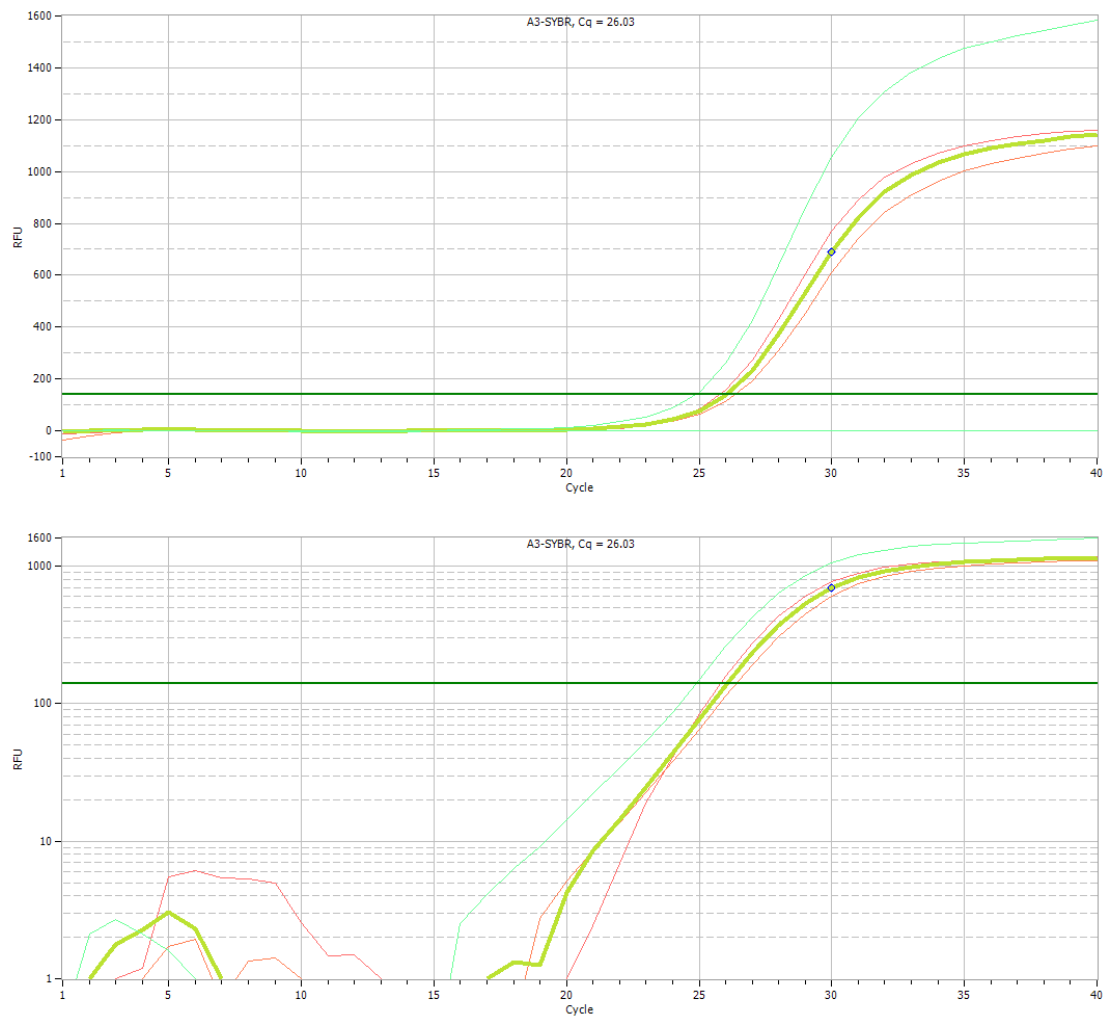

Linear (upper) and log (lower) views of the amplification curves representing the Ct values of *Bax*.

#### Calculation of fold change

| Group    | <i>Bax</i><br>Aver CT | Delta Ct | Delta<br>delta Ct | Fold<br>change | SEM  |
|----------|-----------------------|----------|-------------------|----------------|------|
| Cnt      | 26.33                 | 1.94     | 0.00              | 1.00           | 0    |
| AvS      | 26.03                 | 1.81     | -0.13             | 1.09           | 0.12 |
| CsA      | 24.82                 | 0.69     | -1.25             | 2.38           | 0.13 |
| AvS+ CsA | 25.74                 | 1.24     | -0.70             | 1.62           | 0.11 |

## 5) Casp3 gene

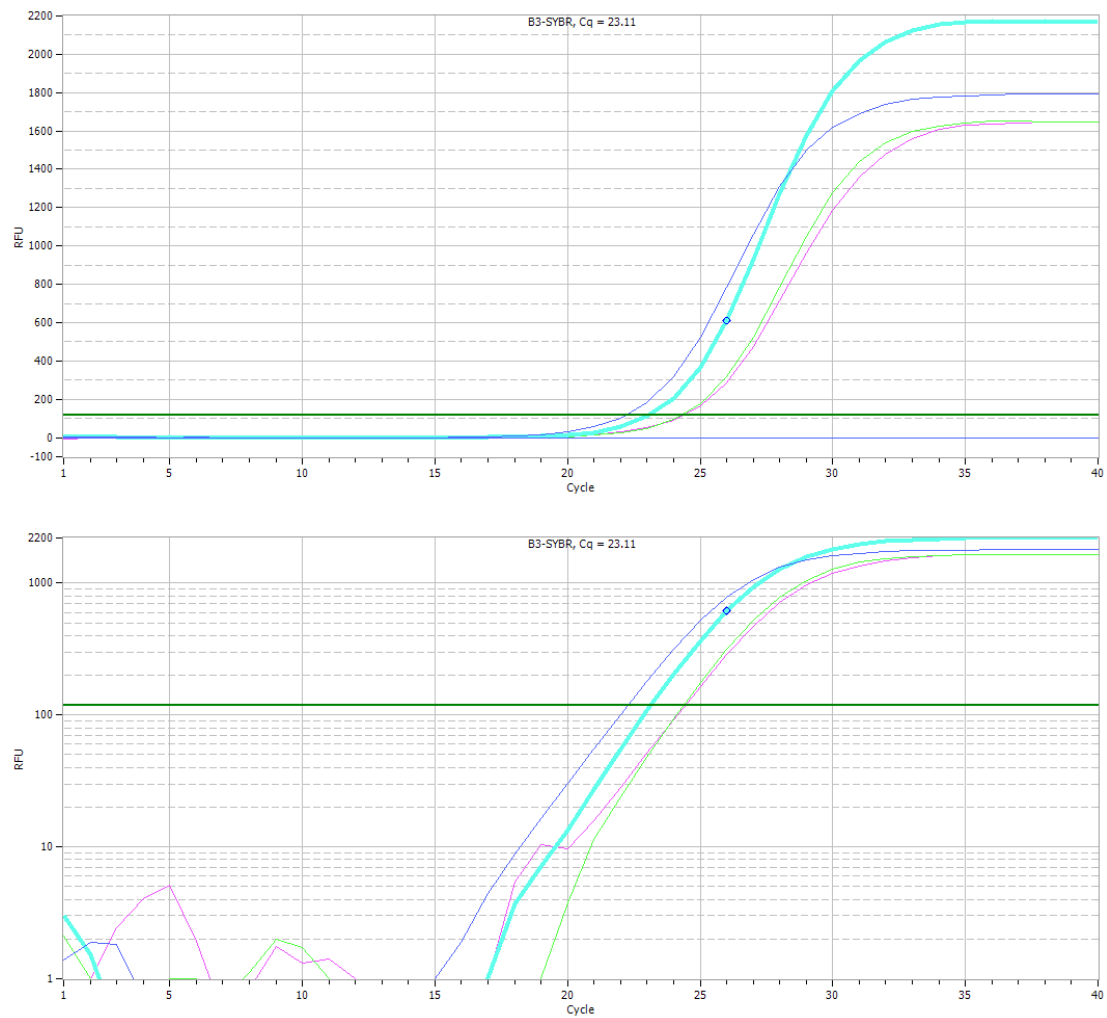

Linear (upper) and log (lower) views of the amplification curves representing the Ct values of *Casp3*.

### Calculation of fold change

| Group    | <i>Casp3</i><br>Aver CT | Delta Ct | Delta<br>delta Ct | Fold<br>change | SEM  |
|----------|-------------------------|----------|-------------------|----------------|------|
| Cnt      | 24.31                   | -0.08    | 0.00              | 1.00           | 0    |
| AvS      | 24.39                   | 0.10     | 0.18              | 0.88           | 0.07 |
| CsA      | 22.23                   | -1.08    | -1.00             | 2.00           | 0.1  |
| AvS+ CsA | 23.11                   | -0.69    | -0.61             | 1.53           | 0.09 |

## 6) *Bcl2* gene

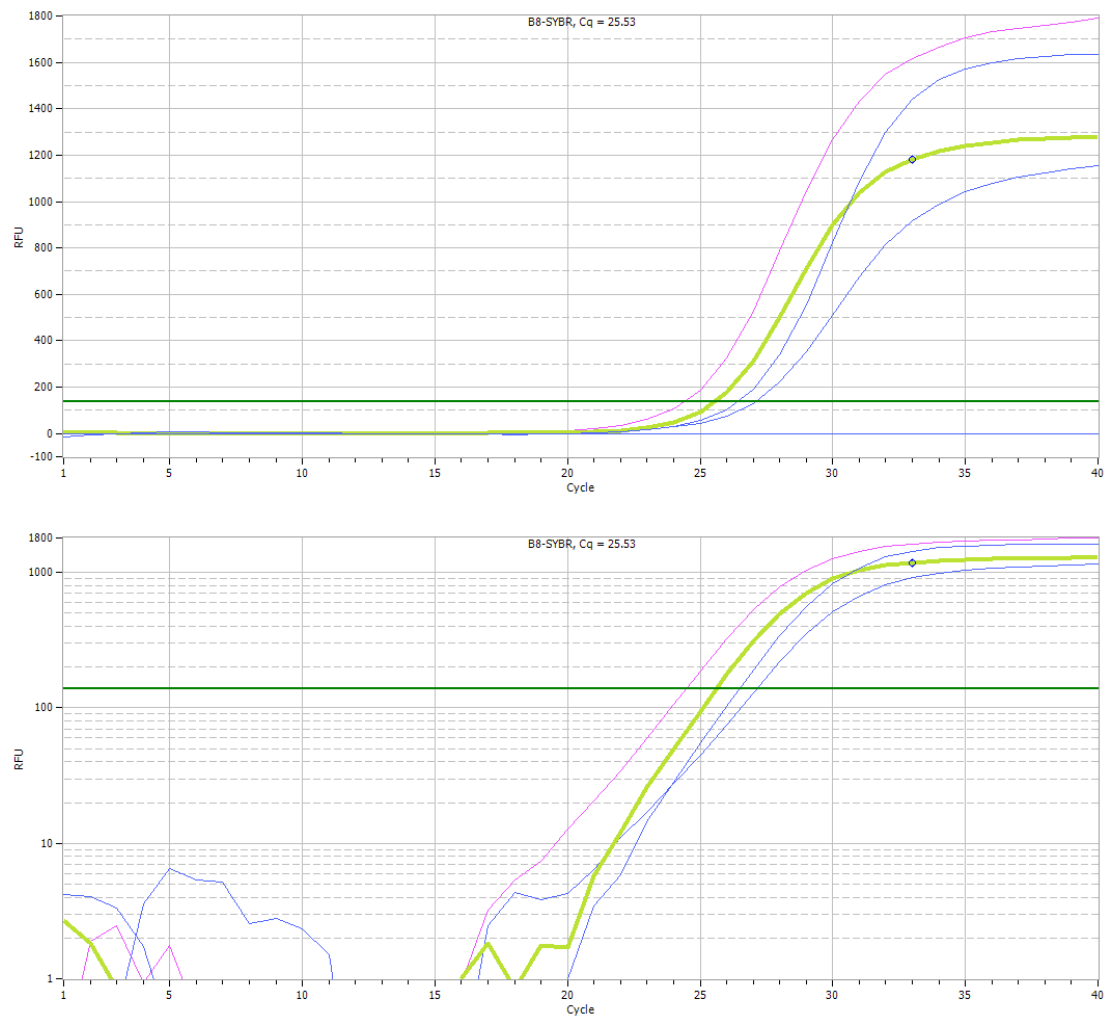

Linear (upper) and log (lower) views of the amplification curves representing the Ct values of *Bcl2*.

Calculation of fold change

| Group    | <i>Bcl2</i><br>Aver CT | Delta Ct | Delta<br>delta Ct | Fold<br>change | SEM  |
|----------|------------------------|----------|-------------------|----------------|------|
| Cnt      | 25.53                  | 1.14     | 0.00              | 1.00           | 0    |
| AvS      | 24.4                   | 1.04     | -0.10             | 1.07           | 0.07 |
| CsA      | 27.1                   | 2.97     | 1.83              | 0.28           | 0.03 |
| AvS+ CsA | 26.41                  | 2.05     | 0.91              | 0.53           | 0.03 |
